# Supplementary material
Source: publisher site journal article supplement (https://www.dovepress.com/get_supplementary_file.php?f=447772.docx)

**Supplementary Figure 1**


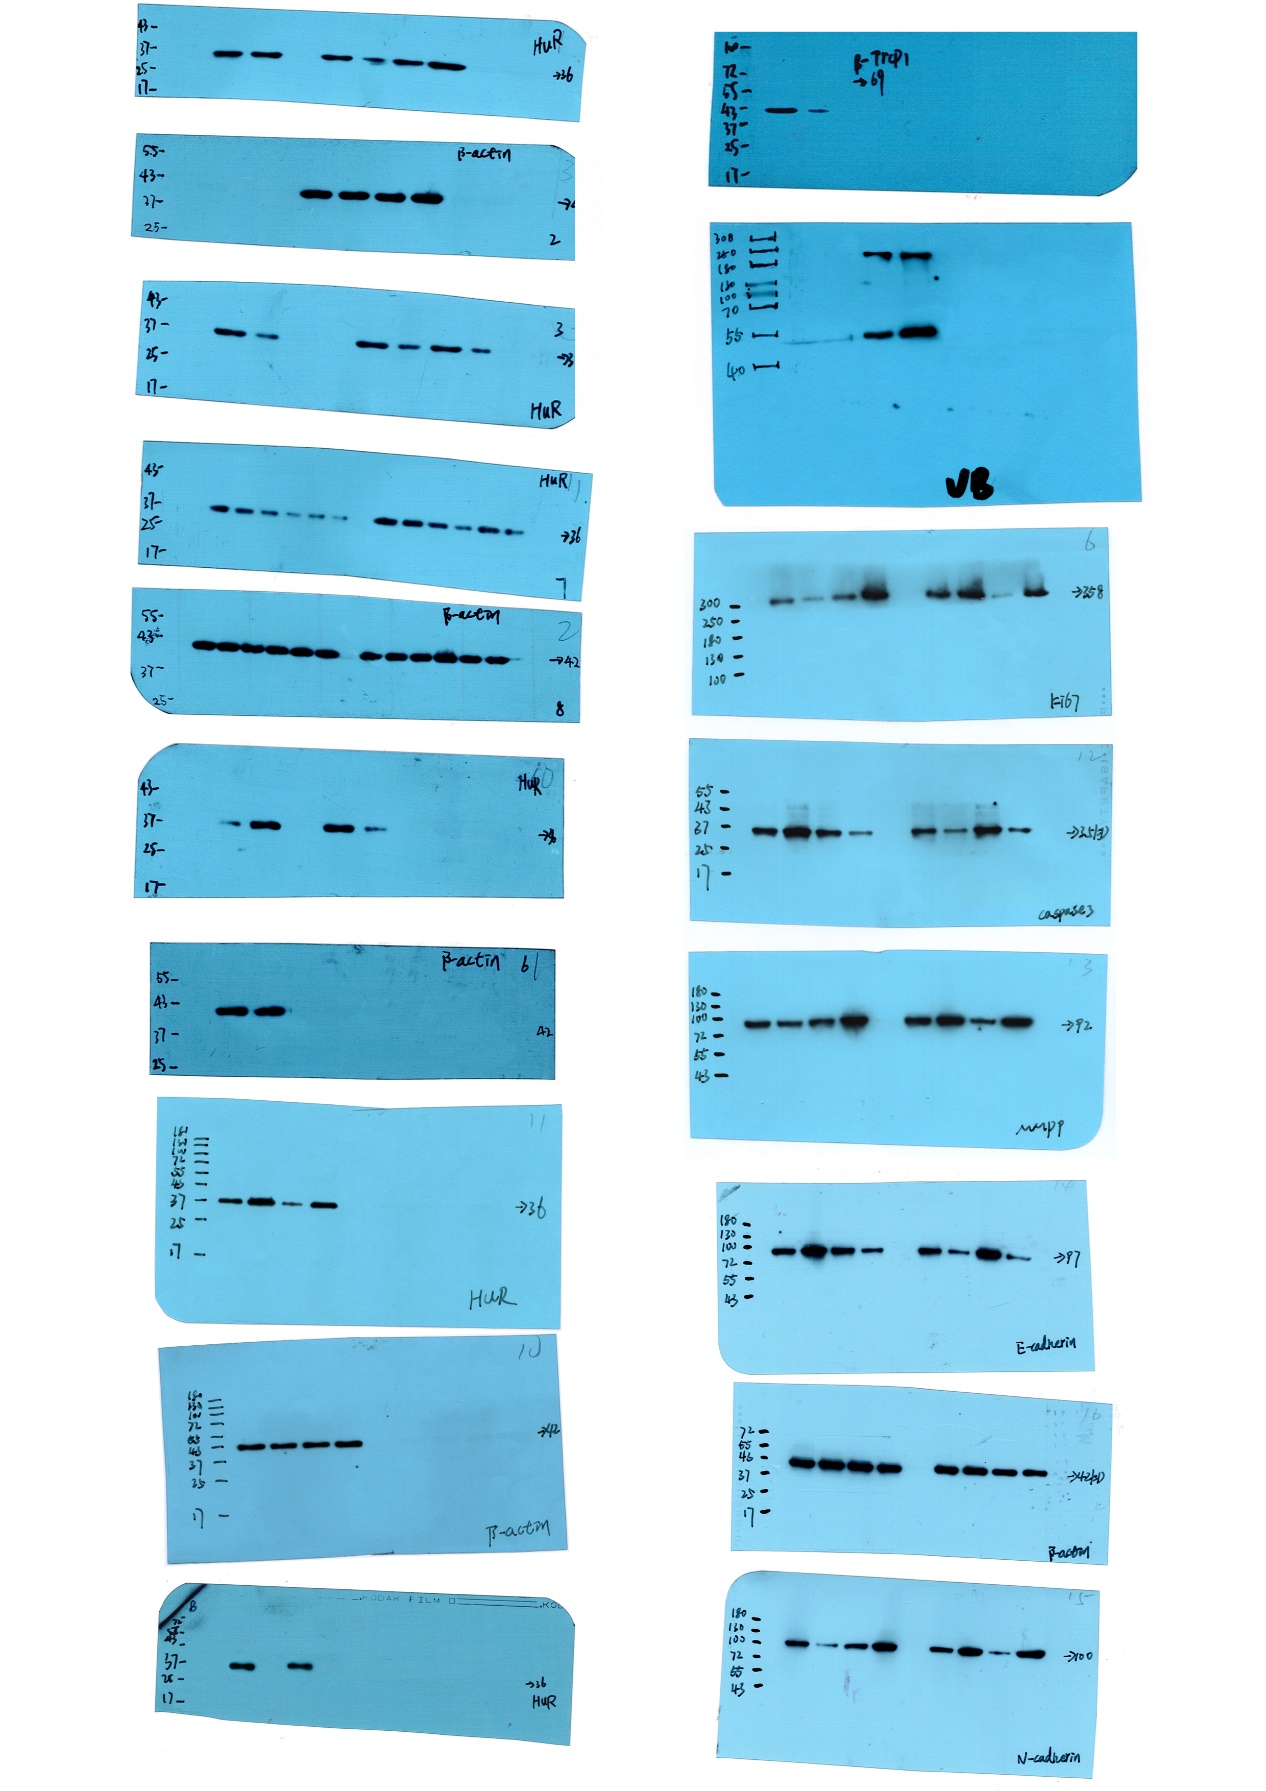

Supplement: Supplementary file 1 [file get_supplementary_file.php]
